# Supplementary material for: Sec24 phosphorylation regulates autophagosome abundance during nutrient deprivation
Source: eLife. 2016 Nov 18;5:e21167. doi: 10.7554/eLife.21167 (PMC5148606; doi:10.7554/eLife.21167)
Supplement: Supplementary file 1. — Sec24-His6 was purified from yeast and subjected to tandem mass spectrometry as described in the Materials and Methods. Phosphorylation sites with a confidence level of 40% or greater were further analyzed. Phosphorylated residues were mutated to either aspartic or glutamic acid and introduced into sec24∆ and sec24∆iss1∆ deletion strains as described in the Materials and Methods. Sec24 and Iss1 were aligned using MAFFT alignment program and residues were considered conserved if either serine or threonine. DOI: http://dx.doi.org/10.7554/eLife.21167.026 [file elife-21167-supp1.xlsx]

## Sheet: Table 1
Supplementary file 1. Identification of Sec24 phosphorylation sites
Phosphosites in Sec24	Confidence (%)	Phosphomimetic Growth Phenotype		Conserved in Iss1
		sec24∆	sec24∆iss1∆
T152/T155	99, 99	None	None	-, +
S172	46	None	None	+
T305	99	None	None	-
S316/S319	99, 97.8	None	None	-, -
T324/T325	99, 99	None	Not Viable	+, +
T324/T328	99, 99	None	None	+, +
T325/T328	99, 99	Not Viable	Not Viable	+, +
S363/S369/S395	99, 99, 99	None	None	-, -, -
S463	82.7	None	None	-
S469	99	None	None	-
T472	99	None	None	+
S549	97	None	None	+
T635	40	Not Viable	Not Viable	+
T636/S638	99, 99	None	Not Viable	+, +
S645/S678	99, 99	None	None	+, +
S693	99	None	None	+
S725	99	None	None	-
S730/S735	99, 99	None	None	+, +
T778/T780	99, 99	None	None	-, -
