# Supplementary figures and images for: Sec24 phosphorylation regulates autophagosome abundance during nutrient deprivation
Source: eLife journal article supplement (doi:10.7554/elife.21167), 2016-11-18

**A**

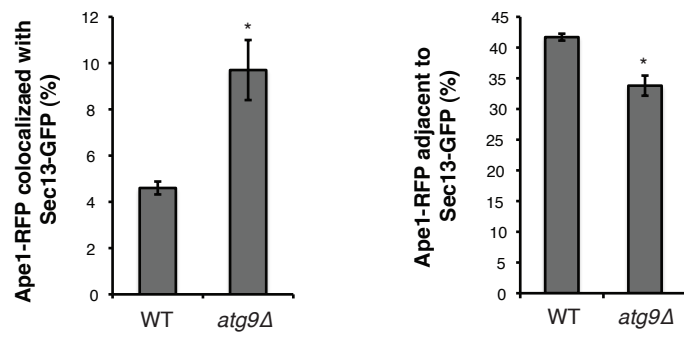

**B**

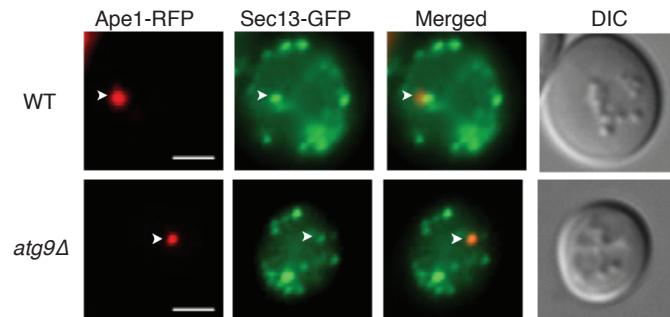

Figure 7 - Supplement 1

Supplement: supp [file elife-21167-supp-v1.zip]

**A**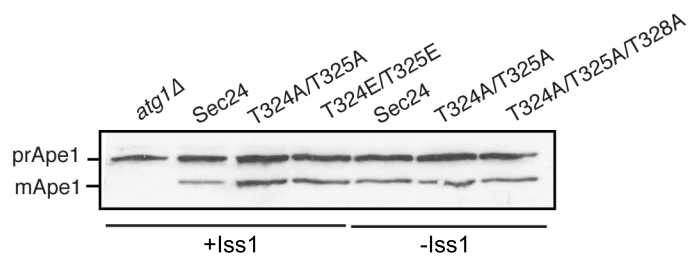**B**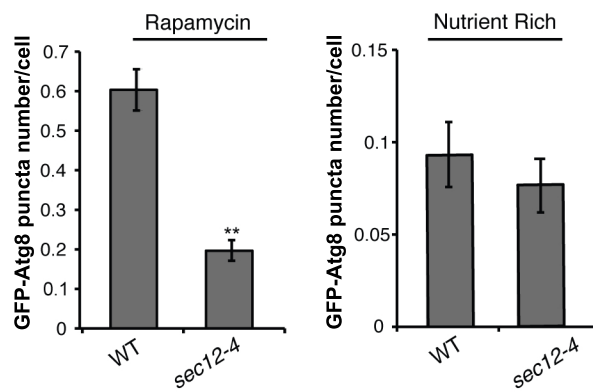**C**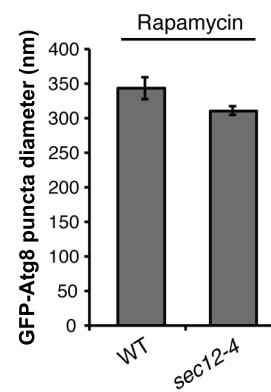

Figure 3 - supplement 1

Supplement: supp [file elife-21167-supp-v1.zip]

**A**

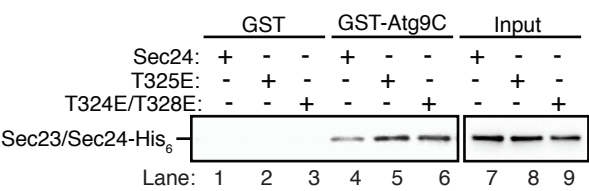

**B**

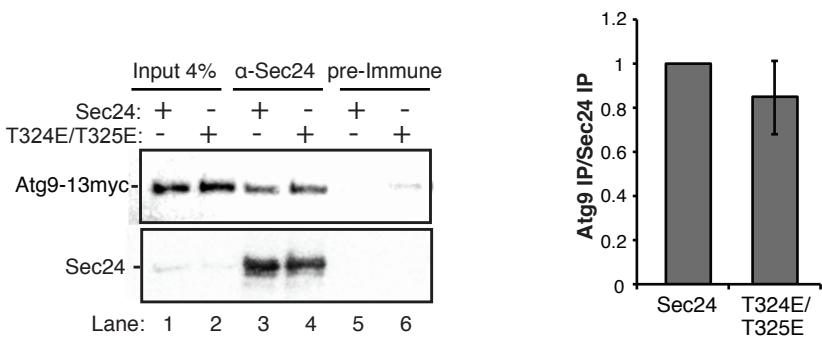

Figure 5 - supplement 1

Supplement: supp [file elife-21167-supp-v1.zip]

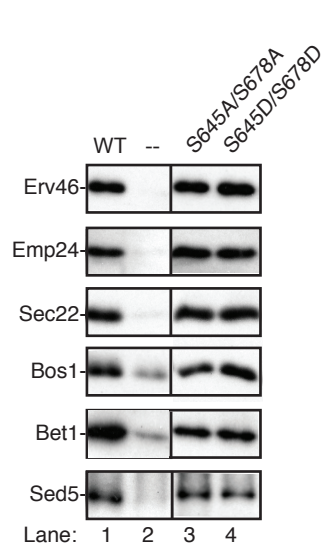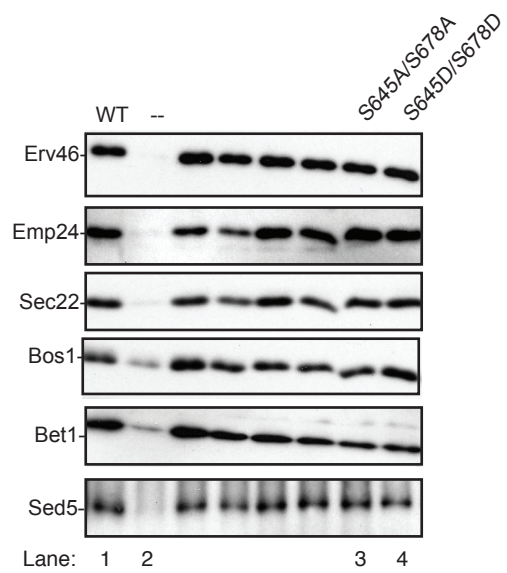

Figure 1 - supplement 2

Supplement: supp [file elife-21167-supp-v1.zip]

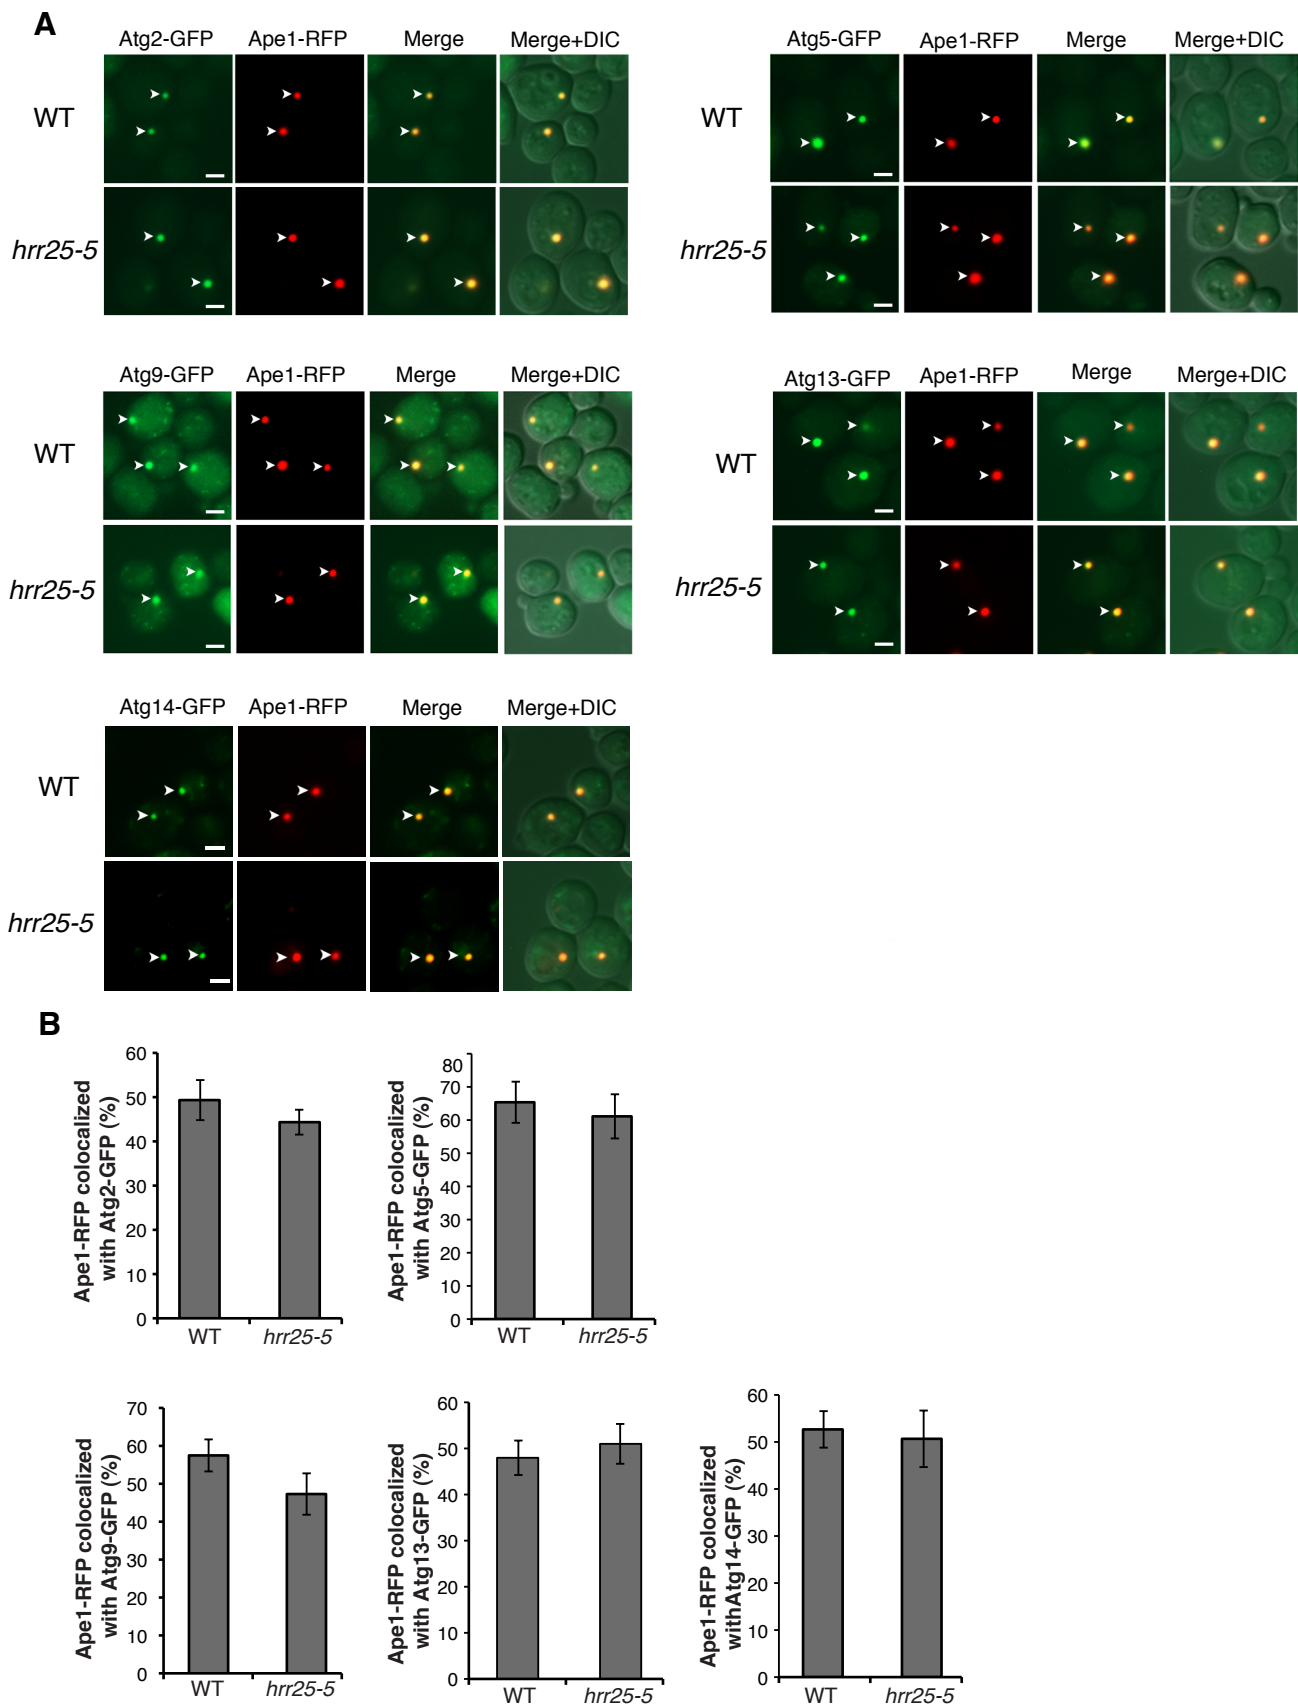

Figure 6 - supplement 3

Supplement: supp [file elife-21167-supp-v1.zip]

**A**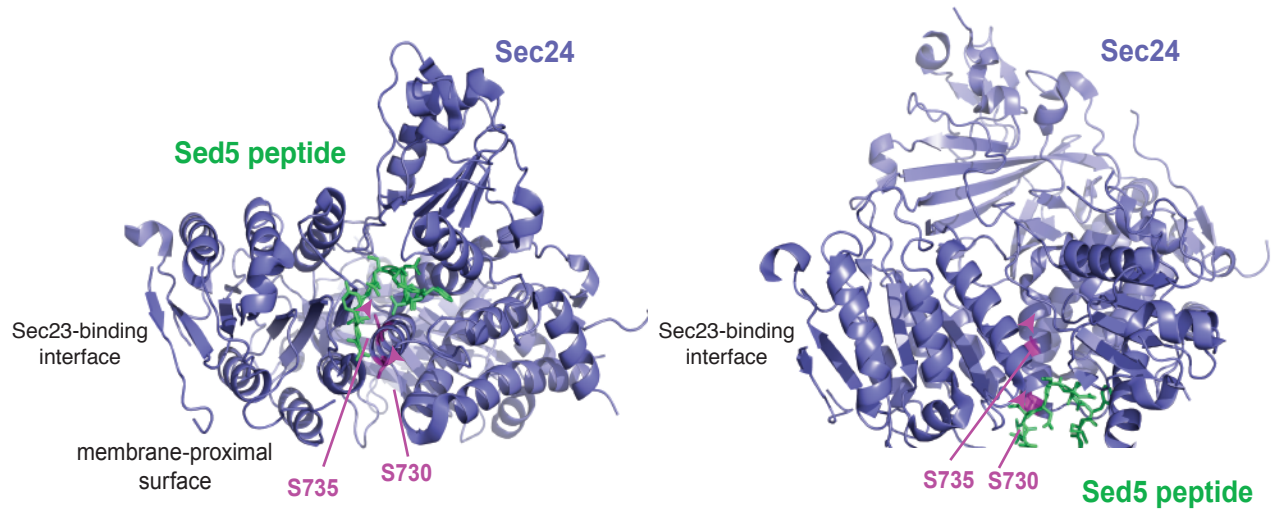**B**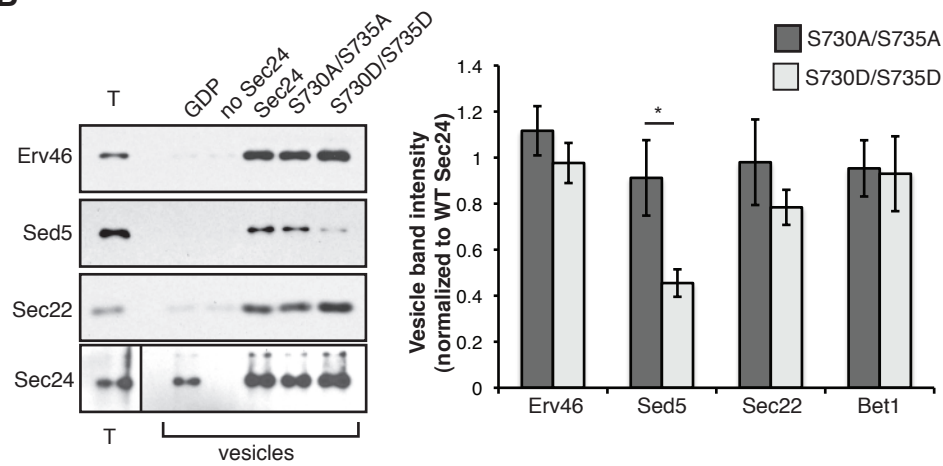**C**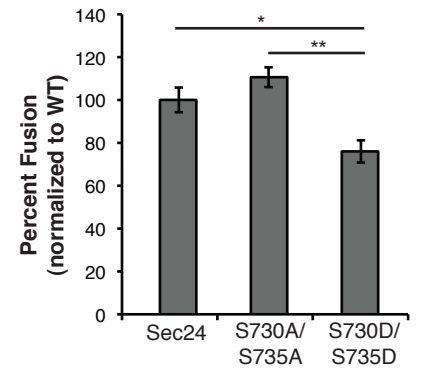**D**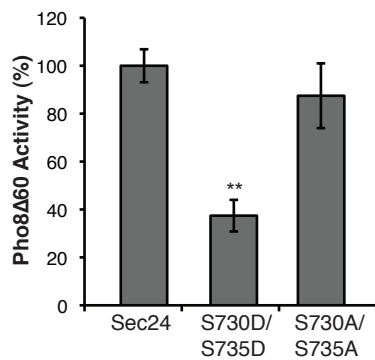**E**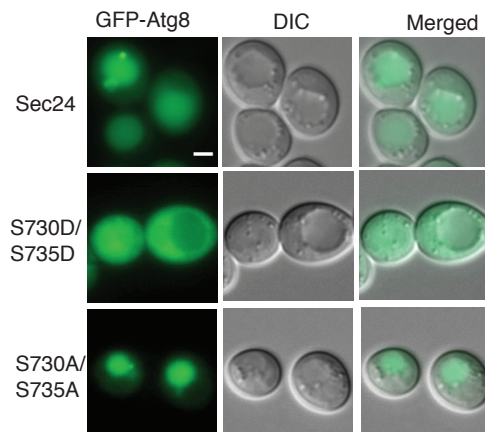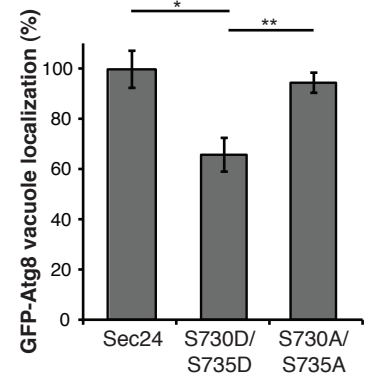

Figure 1 - supplement 1

Supplement: supp [file elife-21167-supp-v1.zip]

**A**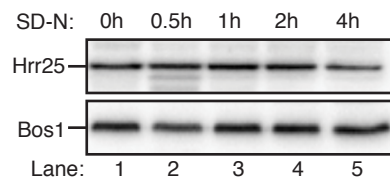**B**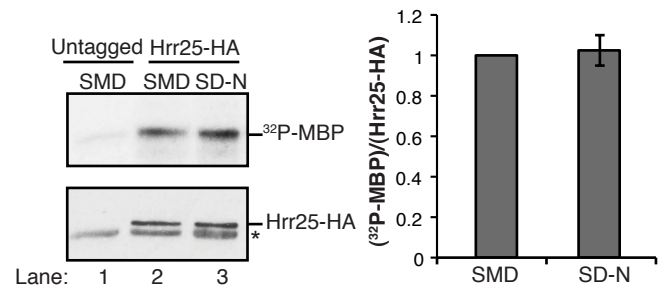

Figure 6 - supplement 2

Supplement: supp [file elife-21167-supp-v1.zip]

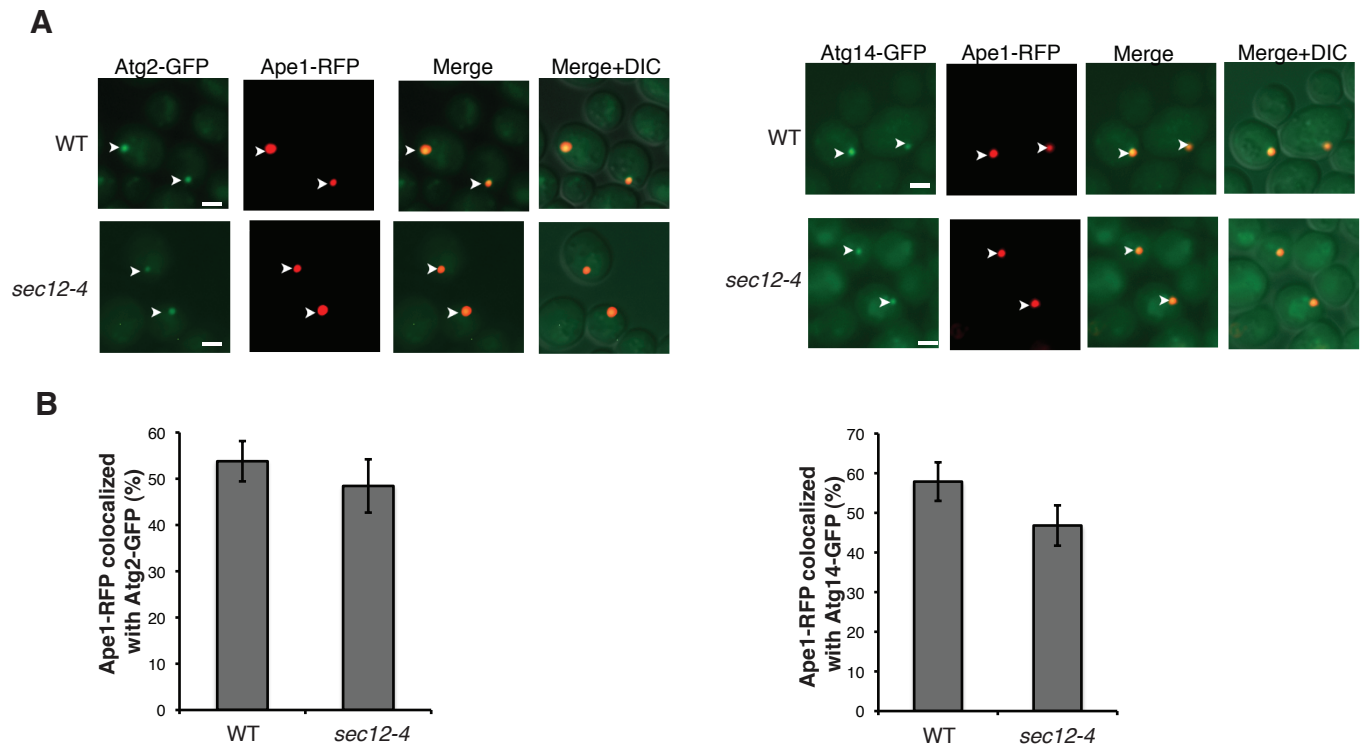

Figure 6 - supplement 4

Supplement: supp [file elife-21167-supp-v1.zip]

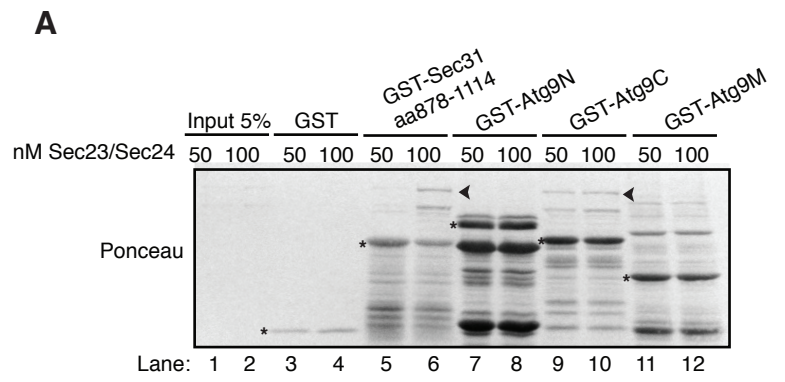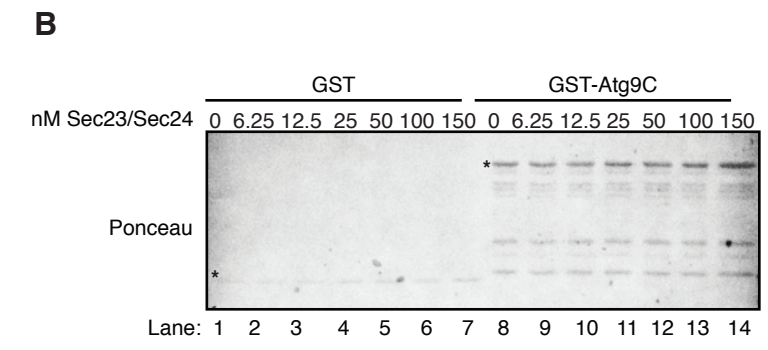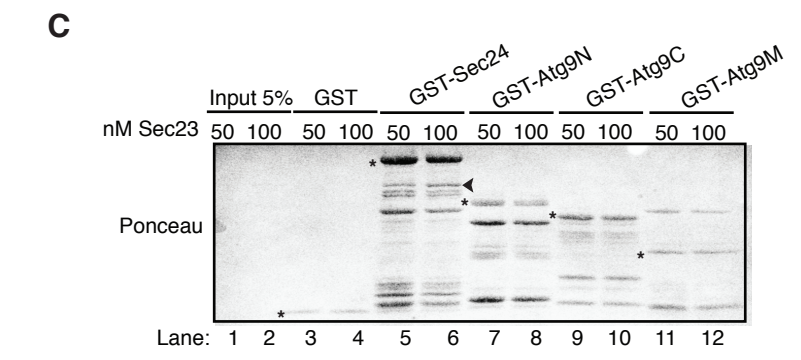

Figure 4 - supplement 1

Supplement: supp [file elife-21167-supp-v1.zip]

**A**

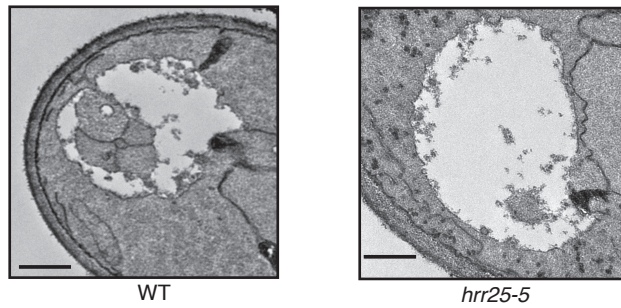

**B**

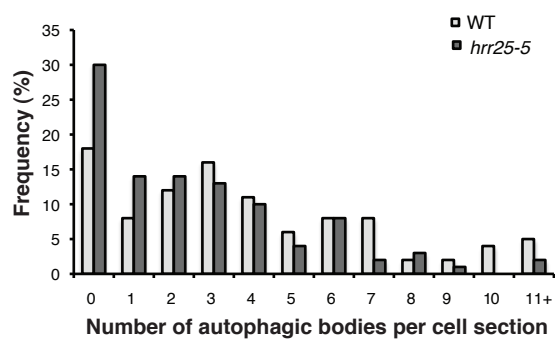

**C**

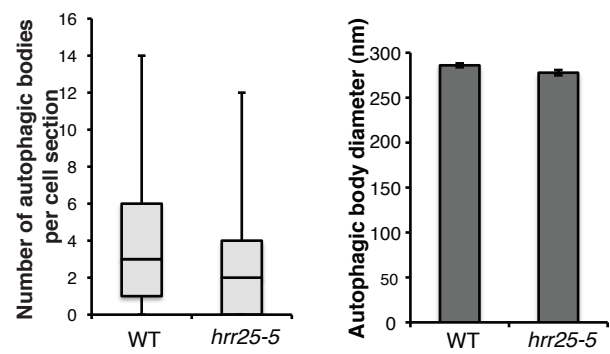

Figure 5 - supplement 5

Supplement: supp [file elife-21167-supp-v1.zip]

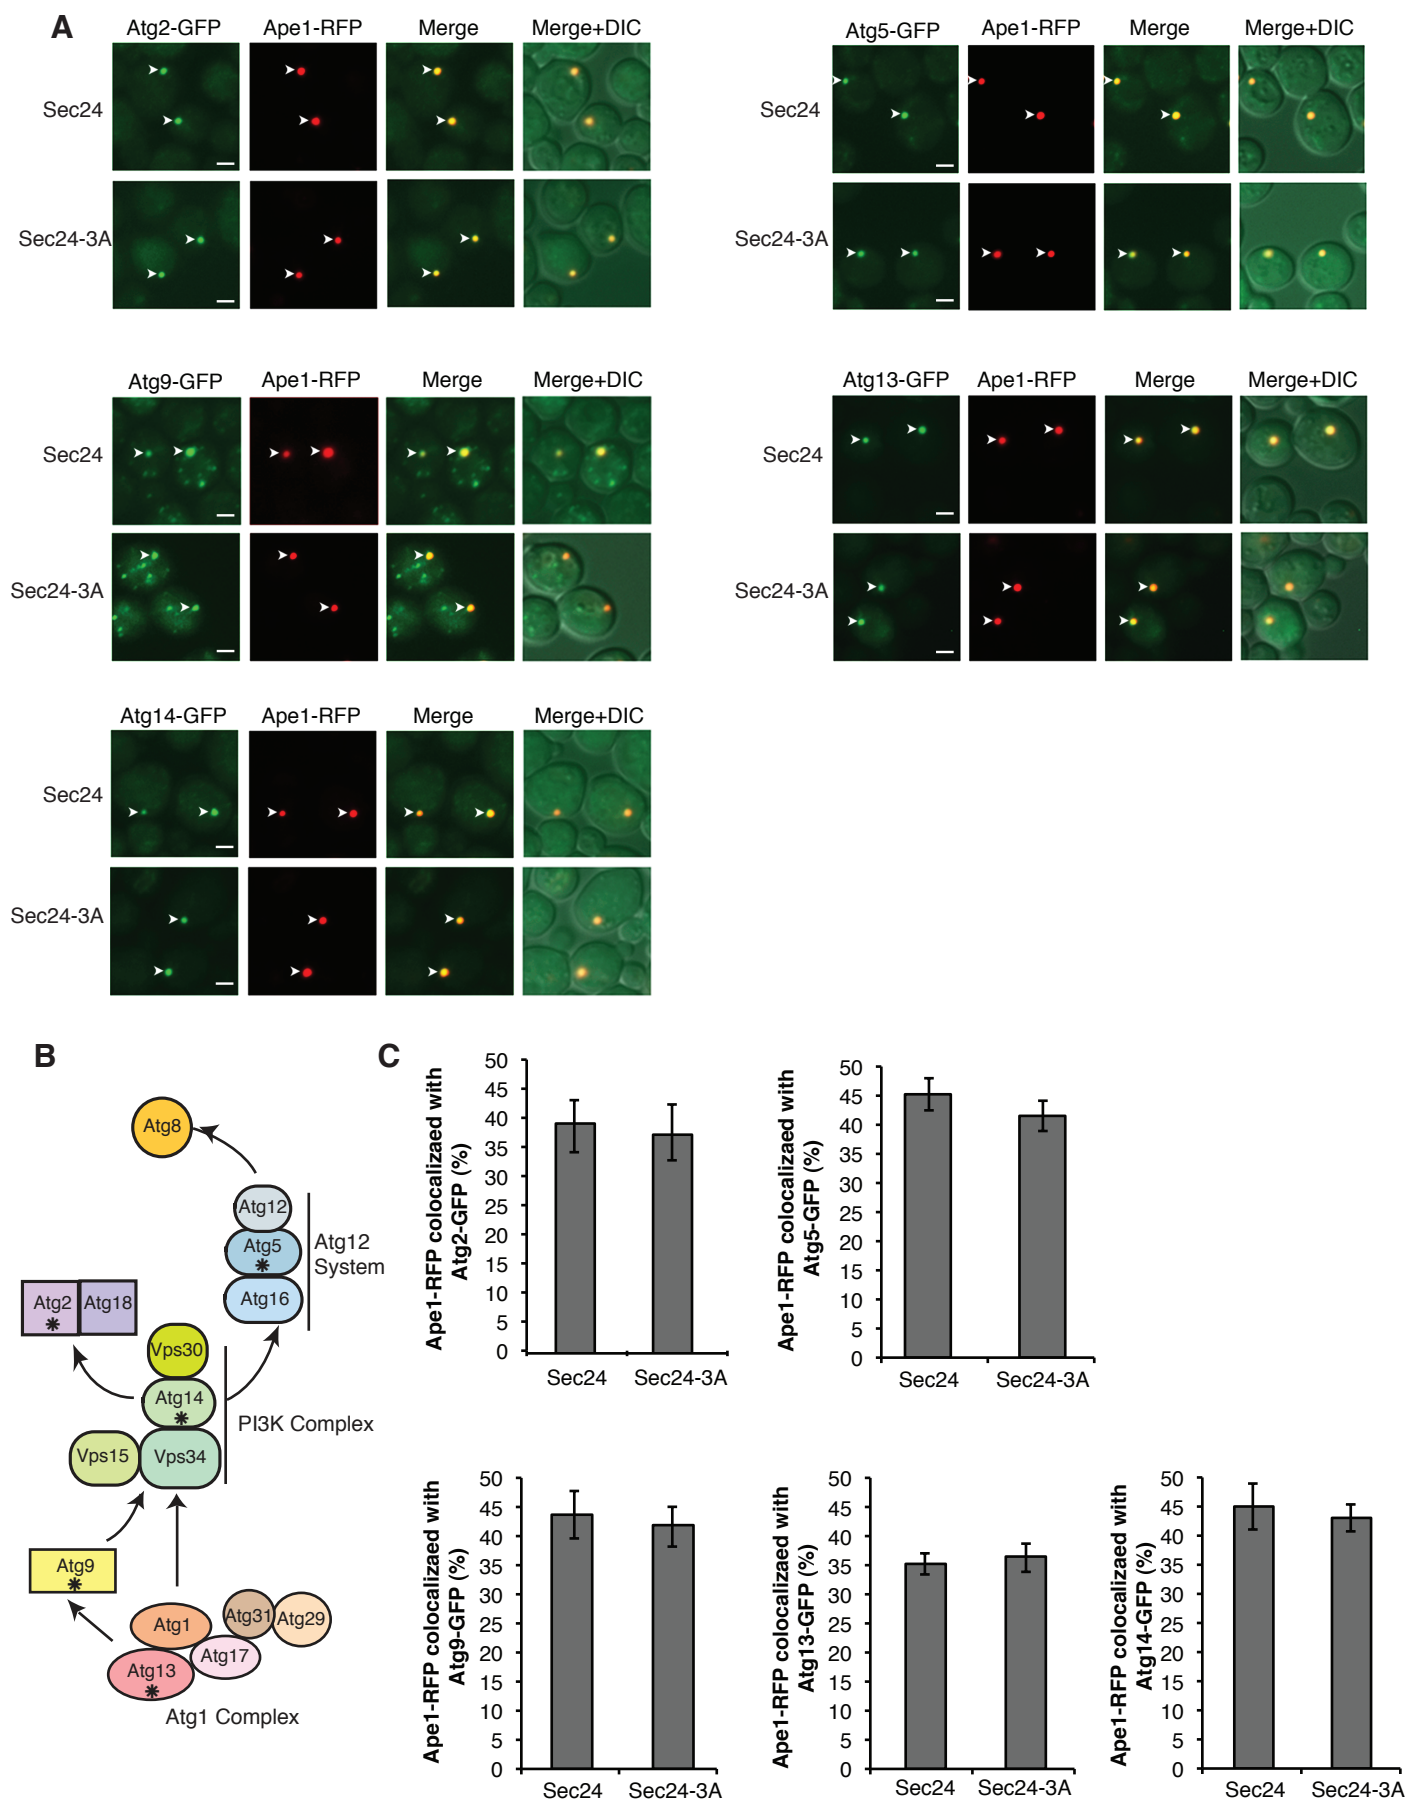

Figure 5 - supplement 2

Supplement: supp [file elife-21167-supp-v1.zip]

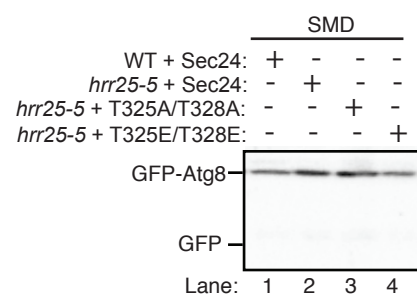

Figure 6 - supplement 1

Supplement: supp [file elife-21167-supp-v1.zip]

**A**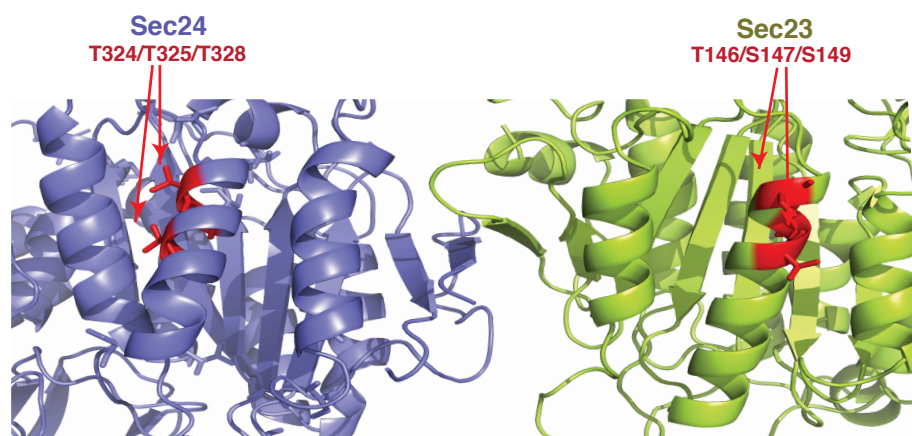**B**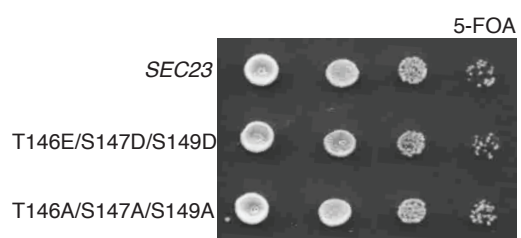**C**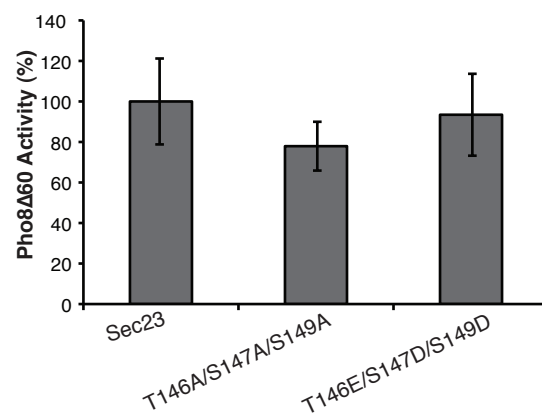**D**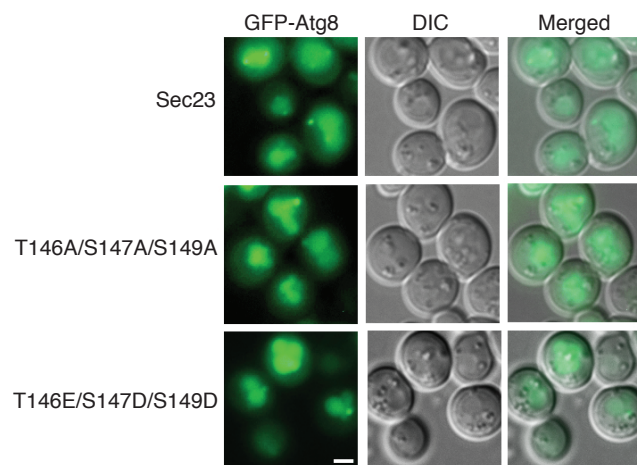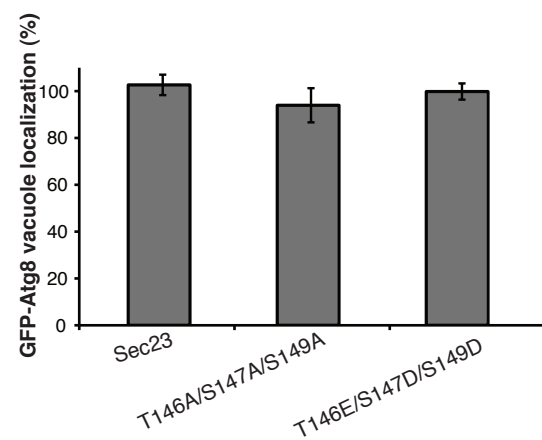

Figure 2 - supplement 2

Supplement: supp [file elife-21167-supp-v1.zip]

**A**

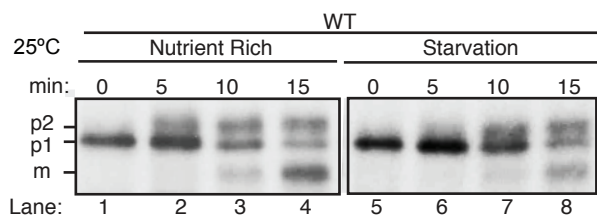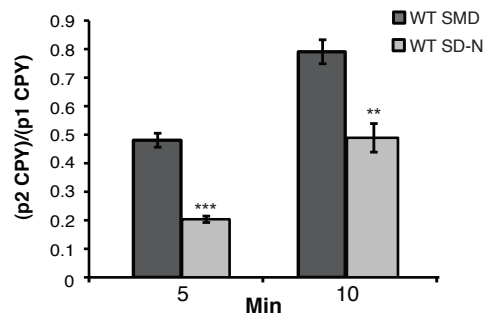

**B**

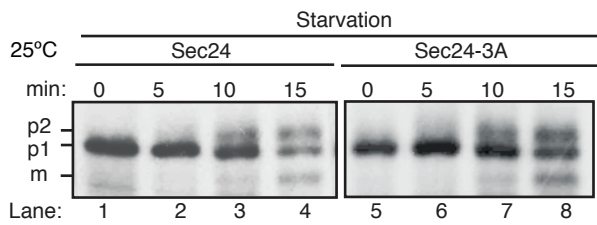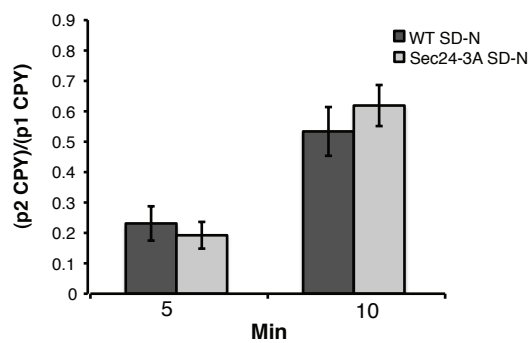

**C**

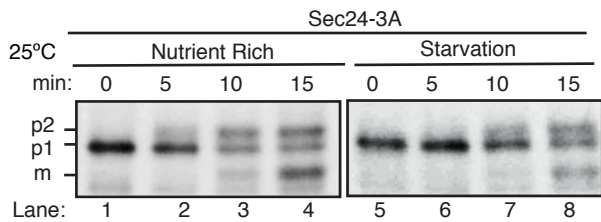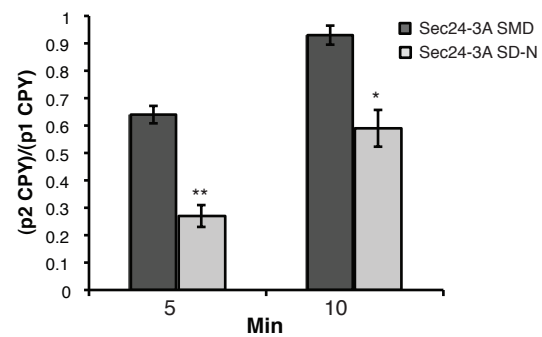

Figure 2 - supplement 1

Supplement: supp [file elife-21167-supp-v1.zip]

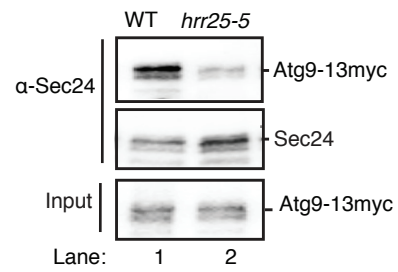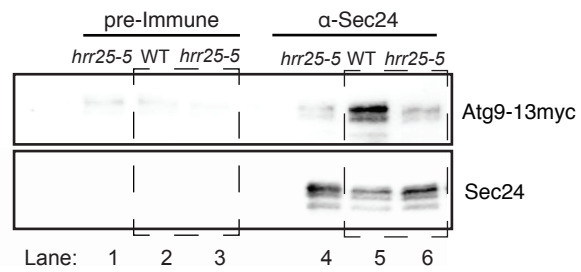

Figure 5 - supplement 4

Supplement: supp [file elife-21167-supp-v1.zip]

**A**

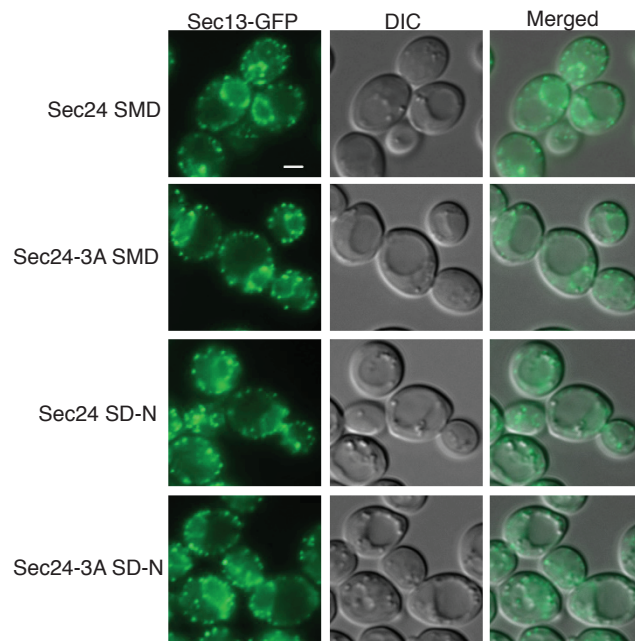

**B**

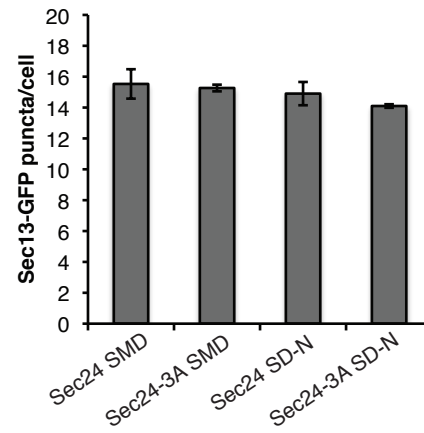

Supplement: supp [file elife-21167-supp-v1.zip]
